# Supplementary material
Source: PubMed Central journal article supplement (PMC3003139)
Supplement: neo1212_1041SD1.pdf [file neo1212_1041SD1.pdf]

**Supplementary Data**

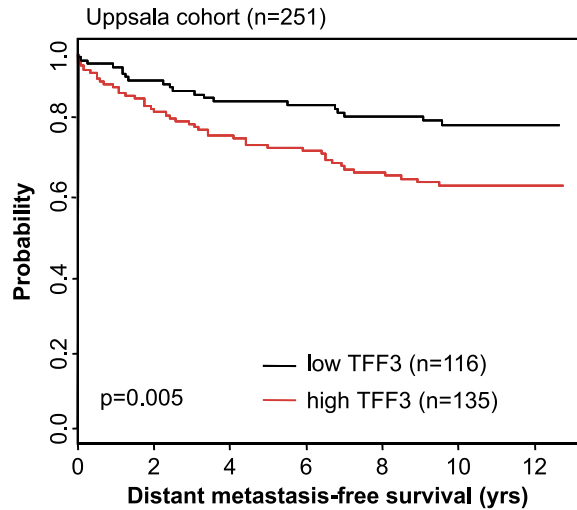

**Figure W1.** *TFF3* mRNA expression is correlated with decreased DMFS in breast cancer patients. 251 breast cancer patients of the Uppsala cohort were split into two groups: low *TFF3* expression (below mean) and high *TFF3* expression (above mean). The DMFS of these two groups was compared by Kaplan-Meier (K-M) analysis as described in the Materials and Methods section.

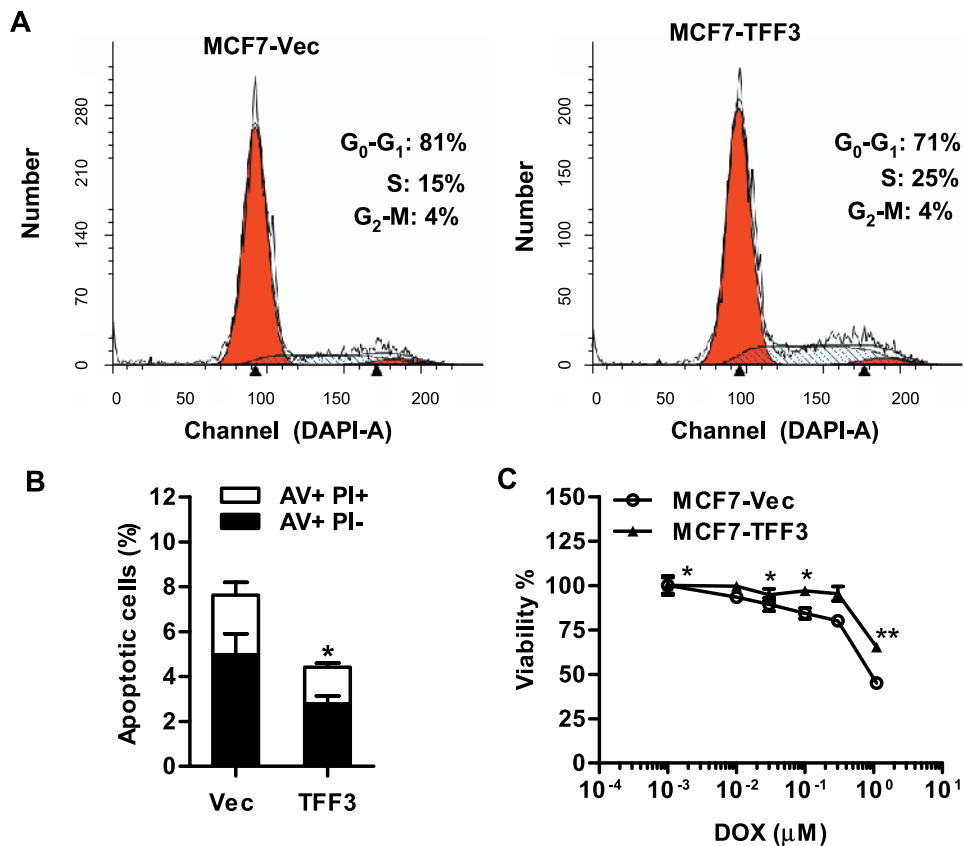

**Figure W2.** Forced expression of TFF3 increases cell cycle entry and reduces apoptosis of human mammary carcinoma cells. (A) Cell cycle analysis of MCF7-Vec and MCF7-TFF3 cells by DAPI staining after 24 hours of serum depletion. (B) Determination of early and late apoptosis of MCF7-Vec and MCF7-TFF3 cells by annexin V (AV) and propidium iodide (PI) double staining. Both early apoptosis (AV+ PI-) and later apoptosis (AV+ PI+) are presented as the percentage of total cells. (C) Cell viability of MCF7-Vec and MCF7-TFF3 cells after treatment with doxorubicin at various concentrations in 0.5% FBS for 3 days was determined by MTT assay. \* $P < .05$ , \*\* $P < .01$ .

**Table W1.** Sequences of Oligonucleotide Primers Used for Semiquantitative RT-PCR.

| Genes            | Abbreviation           |         | Primer Sequence (5'-3') | Amplicon Size (bp) |
|------------------|------------------------|---------|-------------------------|--------------------|
| Trefoil factor 3 | <i>TFE3</i>            | Forward | GGCTGTGATTGCTGCCAG      | 125                |
|                  |                        | Reverse | GTGGAGCATGGGACCTTTAT    |                    |
| Beta-actin       | $\beta$ - <i>ACTIN</i> | Forward | ATGATATCGCCGCGCTCG      | 580                |
|                  |                        | Reverse | CGCTCGGTGAGGATCTTCA     |                    |

**Table W2.** Sequences of Oligonucleotide Primers Used for qPCR.

| Genes                                                               | Abbreviation           |         | Primer Sequence (5'-3')         | Amplicon Size (bp) |
|---------------------------------------------------------------------|------------------------|---------|---------------------------------|--------------------|
| v-akt murine thymoma viral oncogene homolog 1                       | <i>AKT1</i>            | Forward | GCACAAACGAGGGGAGTACAT           | 113                |
|                                                                     |                        | Reverse | CCTCACGTTGGTCCACATC             |                    |
| v-raf murine sarcoma 3611 vial oncogene homolog 1                   | <i>ARAF1</i>           | Forward | CTTGCTGTCTCCAGCTCT              | 124                |
|                                                                     |                        | Reverse | CCGGTTGTTGCACTCCTT              |                    |
| Ataxia telangiectasia mutated                                       | <i>ATM</i>             | Forward | TGGATCCAGCTATTTGGTTTGA          | 82                 |
|                                                                     |                        | Reverse | CCAAGTATGTAACCAACAATAGAAGAAGTAG |                    |
| BCL2-antagonist of cell death                                       | <i>BAD</i>             | Forward | CCCAGAGTTTGAGCCGAGTG            | 249                |
|                                                                     |                        | Reverse | CCCATCCCTTCGTCTGCTCT            |                    |
| BCL2-antagonist killer 1                                            | <i>BAK1</i>            | Forward | GAACAGGAGGCTGAAGGGGT            | 307                |
|                                                                     |                        | Reverse | TCAGGCCATGCTGGTAGACG            |                    |
| BCL2-associated X protein                                           | <i>BAX</i>             | Forward | GGGTGGTTGGGTGAGACTC             | 199                |
|                                                                     |                        | Reverse | AGACACGTAAGGAAAACGCATTA         |                    |
| B-cell CLL/lymphoma 2                                               | <i>BCL2</i>            | Forward | TCCGCATCAGGAAGGCTAGA            | 113                |
|                                                                     |                        | Reverse | AGGACCAGGCCTCCAAGCT             |                    |
| BCL2-like 1                                                         | <i>BCL2L1</i>          | Forward | ATGGCAGCAGTAAAGCAAGC            | 149                |
|                                                                     |                        | Reverse | CGGAAGAGTTCATTCACTACCTGT        |                    |
| beta-Actin                                                          | $\beta$ - <i>ACTIN</i> | Forward | TTCTGGGCATGGAGTC                | 84                 |
|                                                                     |                        | Reverse | CAGGTCTTTGCGGATGTC              |                    |
| Baculoviral IAP repeat-containing 5                                 | <i>BIRC5</i>           | Forward | TCCACTGCCCCACTGAGAAC            | 76                 |
|                                                                     |                        | Reverse | TGGCTCCCAGCCTTCCA               |                    |
| Breast cancer 1, early onset                                        | <i>BRCA1</i>           | Forward | CATGCTGAAACTTCTCAACCAGAA        | 81                 |
|                                                                     |                        | Reverse | TGTAGGCTCCTTTTGGTTATATCATTC     |                    |
| Caspase 7, apoptosis-related cysteine peptidase                     | <i>CASP7</i>           | Forward | AGTGACAGGTATGGCCGTTCC           | 274                |
|                                                                     |                        | Reverse | GCATCTATCCCCCTAAAGTGG           |                    |
| Cyclin A1                                                           | <i>CCNA1</i>           | Forward | AAACTACTAAAGTCTAAGGGAAA         | 170                |
|                                                                     |                        | Reverse | CTTCTACAATAAGTTTCTGAATG         |                    |
| Cyclin D1                                                           | <i>CCND1</i>           | Forward | ACGAAGTCTCGCGGTGTT              | 323                |
|                                                                     |                        | Reverse | CCGCTGGCCATGAACTACCT            |                    |
| Cyclin E1                                                           | <i>CCNE1</i>           | Forward | ATCAGCACTTCTTGAGCAACA           | 122                |
|                                                                     |                        | Reverse | TTGTGCCAAGTAAAAGGTCTCC          |                    |
| Cell division cycle 25A                                             | <i>CDC25A</i>          | Forward | TAAGACCTGTATCTCGTGGCTG          | 131                |
|                                                                     |                        | Reverse | CCCTGGTTCCTGCTATCTCT            |                    |
| Cyclin-dependent kinase 1                                           | <i>CDK1</i>            | Forward | TCGAAAGCCAAGATAAGCAAC           | 137                |
|                                                                     |                        | Reverse | CCGCAACAGGGAAGAACAGT            |                    |
| Cyclin-dependent kinase 2                                           | <i>CDK2</i>            | Forward | GCTAGCAGACTTTGGACTAGCCAG        | 85                 |
|                                                                     |                        | Reverse | AGCTCGGTACCACAGGGTCA            |                    |
| Cyclin-dependent kinase 4                                           | <i>CDK4</i>            | Forward | CTGGTGTTTGAGCATGTAGACC          | 102                |
|                                                                     |                        | Reverse | AAACTGGCGCATCAGATCCTT           |                    |
| Cyclin-dependent kinase inhibitor 1A (p21)                          | <i>CDKN1A</i>          | Forward | CCTCATCCCCTGTTCTCCTTT           | 97                 |
|                                                                     |                        | Reverse | GTACCACCCAGCGACAAGT             |                    |
| Cyclin-dependent kinase inhibitor 1B (p27)                          | <i>CDKN1B</i>          | Forward | CTGCAACCGACGATTCTTCTACT         | 101                |
|                                                                     |                        | Reverse | GGGC GTC TGCTCCACAGA            |                    |
| Cyclin-dependent kinase inhibitor 2A (melanoma, p16, inhibits CDK4) | <i>CDKN2A</i>          | Forward | CAACGCACCGAATAGTTACGG           | 96                 |
|                                                                     |                        | Reverse | AACCTCGTCTCCAGAGTCGC            |                    |
| Cadherin type 1                                                     | <i>CDH1</i>            | Forward | ACACCCGGGACAACGTTTA             | 81                 |
|                                                                     |                        | Reverse | TGTGCAGCTGGCTCAAGTC             |                    |
| Cadherin associated protein, alpha 1                                | <i>CTNNA1</i>          | Forward | CCATGCAGGCAACATAAACTTC          | 81                 |
|                                                                     |                        | Reverse | GGCTCCAACAGTCTCTCAACT           |                    |
| Cadherin associated protein, beta 1                                 | <i>CTNNB1</i>          | Forward | C CCACTGGCCTCTGATAAAGG          | 80                 |
|                                                                     |                        | Reverse | ACGCAAAGGTGCATGATTG             |                    |
| Cadherin associated protein, gamma                                  | <i>CTNNG</i>           | Forward | AACAAGAACAACCCCAAGTT            | 134                |
|                                                                     |                        | Reverse | TAGTTACGCATGATCTGCAC            |                    |
| E2F transcription factor 1                                          | <i>E2F1</i>            | Forward | AGATGGTTATGGTGATCAAAGCC         | 72                 |
|                                                                     |                        | Reverse | ATCTGAAAGTTCTCGAAGAGTCC         |                    |
| v-ets erythroblastosis virus E26 oncogene homolog 2                 | <i>ETS2</i>            | Forward | CCCCTGTGGCTAACAGTTACA           | 222                |
|                                                                     |                        | Reverse | AGGTAGCTTTTAAGGCTTGACTC         |                    |
| Fibronectin 1                                                       | <i>FN1</i>             | Forward | CCCATCAGCAGGAACACCTT            | 84                 |
|                                                                     |                        | Reverse | GGCTCACTGCAAGACTTTGAA           |                    |
| v-fos FBJ murine osteosarcoma viral oncogene homolog                | <i>FOS</i>             | Forward | TGCCTCTCCTCAATGACCCTGA          | 162                |
|                                                                     |                        | Reverse | TGCCTCTCCTCAATGACCCTGA          |                    |
| Glyceraldehyde-3-phosphate dehydrogenase                            | <i>GAPDH</i>           | Forward | TGACCACCAACTGCTTAGC             | 84                 |
|                                                                     |                        | Reverse | GGC ATGGACTGTGGTCAATGAG         |                    |

Table W2. (continued)

| Genes                                                                                | Abbreviation     |         | Primer Sequence (5'-3')   | Amplicon Size (bp) |
|--------------------------------------------------------------------------------------|------------------|---------|---------------------------|--------------------|
| Hypoxanthine phosphoribosyltransferase                                               | <i>HPRT</i>      | Forward | TGACACTGGCAAAACAATGCA     | 94                 |
|                                                                                      |                  | Reverse | GGTCCCTTTTCACCAGCAAGCT    |                    |
| HIV-1 Tat interactive protein 2, 30 kDa                                              | <i>HTATIP2</i>   | Forward | CGGAGGGATTGTTCGTGTTG      | 104                |
|                                                                                      |                  | Reverse | AGCTCCTTTAGAGGATAGCAAGT   |                    |
| MET proto-oncogene hepatocyte growth factor receptor)                                | <i>MET</i>       | Forward | TGGTGACAGGAGCAATGG        | 111                |
|                                                                                      |                  | Reverse | CATTCTGGATGGGTGTTTCCG     |                    |
| Matrix metalloproteinase 1                                                           | <i>MMP1</i>      | Forward | AGCTAGCTCAGGATGACATTGATG  | 74                 |
|                                                                                      |                  | Reverse | GCCGATGGGCTGGACAG         |                    |
| Matrix metalloproteinase 2                                                           | <i>MMP2</i>      | Forward | CAAAAACAAGAAGACATACATCTT  | 232                |
|                                                                                      |                  | Reverse | GCTTCCAAACTTCACGCTC       |                    |
| Matrix metalloproteinase 9                                                           | <i>MMP9</i>      | Forward | TGGGGGCAACTCGGC           | 224                |
|                                                                                      |                  | Reverse | GGAATGATCTAAGCCCAG        |                    |
| Metastasis associated 1                                                              | <i>MTA1</i>      | Forward | GCTGTACACCACACAGTCTT      | 166                |
|                                                                                      |                  | Reverse | GGACTCATGTTACTGCGGTTT     |                    |
| Metastasis associated 2                                                              | <i>MTA2</i>      | Forward | CCGACGGCCTTATGCTCCT       | 145                |
|                                                                                      |                  | Reverse | CTGGGCCACCAGATCTTTGAC     |                    |
| v-myc myelocytomatosis viral oncogene homolog (avian)                                | <i>MYC</i>       | Forward | TGCTGCCAAGAGGGTCAAGT      | 118                |
|                                                                                      |                  | Reverse | GTGTGTTTCGCTCTTGACATTC    |                    |
| Nuclear factor of kappa light polypeptide gene enhancer in B cells 1 (p105)          | <i>NFκB1</i>     | Forward | TGCCAACAGATGGCCCATA       | 123                |
|                                                                                      |                  | Reverse | TGTTCTTTTCACTAGAGGCACCA   |                    |
| Nuclear factor of kappa light polypeptide gene enhancer in B-cells inhibitor, alpha  | <i>NFκBIA</i>    | Forward | CTCCGAGACTTTCGAGGAAATAC   | 135                |
|                                                                                      |                  | Reverse | GCCATTGTAGTTGGTAGCCTTCA   |                    |
| Nonmetastatic cells 1 protein (NM23A)                                                | <i>NME1</i>      | Forward | GCTGCAGCCGGAGTTCAAAC      | 289                |
|                                                                                      |                  | Reverse | GCAATGAAGGTACGCTCACAGT    |                    |
| Occludin                                                                             | <i>OCN</i>       | Forward | TGCCGCGTTGGTGATCTTT       | 100                |
|                                                                                      |                  | Reverse | GCCCAGGATAGCACTCACTATT    |                    |
| Plasminogen activator urokinase                                                      | <i>PLAU</i>      | Forward | CACGCAAGGGAGATGAA         | 341                |
|                                                                                      |                  | Reverse | ACAGCAITTTGGTGGTGACTT     |                    |
| Plasminogen activator urokinase receptor                                             | <i>PLA UR</i>    | Forward | AATGGCCCGCAGTGTACAG       | 227                |
|                                                                                      |                  | Reverse | CAGGAGACATCAATGTGGTTC     |                    |
| v-raf-1 murine leukemia viral oncogene homolog 1                                     | <i>RAF</i>       | Forward | TTTCTGGATCATGTTCCCT       | 153                |
|                                                                                      |                  | Reverse | ACTTTGGTGCTACAGTGCTCA     |                    |
| Retinoblastoma 1                                                                     | <i>RB1</i>       | Forward | GAACATCGAATCATGGAATCCCT   | 116                |
|                                                                                      |                  | Reverse | AGAGGACAAGCAGATTCAAGGTGAT |                    |
| SI00 calcium binding protein A4                                                      | <i>SI00A4</i>    | Forward | GATGAGCAACTTGACAGCAA      | 123                |
|                                                                                      |                  | Reverse | CTGGGCTGCTTATCTGGGAAG     |                    |
| Serpine peptidase inhibitor, clade B (ovalbumin), member 5                           | <i>SERPINE5</i>  | Forward | CTACTTTGTTGGCAAGTGATGAA   | 90                 |
|                                                                                      |                  | Reverse | ACTGGTTTGGTGTCTGTCTTGTG   |                    |
| Serpine peptidase inhibitor, clade E (nexin, plasminogen activator inhibitor type 1) | <i>SERPINE1</i>  | Forward | CACAAATCAGACGGCAGCACT     | 85                 |
|                                                                                      |                  | Reverse | CATCGGGCGTGGTGAACCTC      |                    |
| Snail homolog 1                                                                      | <i>SNAIL</i>     | Forward | AATCGGAAGCCTAECTACAGCG    | 147                |
|                                                                                      |                  | Reverse | GTCCCAGATGAGCATTGGCA      |                    |
| Synuclein, gamma (breast cancer-specific protein 1)                                  | <i>SNCG</i>      | Forward | TGAGCAGCGTCAACACTGTG      | 64                 |
|                                                                                      |                  | Reverse | GAGGTGACCGCGATGTTCTC      |                    |
| Trefoil factor 1                                                                     | <i>TFF1</i>      | Forward | CATCGACGTCCCTCCAGAAGAG    | 105                |
|                                                                                      |                  | Reverse | CTCTGGGACTAATCACCGTGCTG   |                    |
| Trefoil factor 3                                                                     | <i>TFF3</i>      | Forward | CTTGCTGTCTCCAGCTCT        | 124                |
|                                                                                      |                  | Reverse | COGGTTGTTGCACTCCTT        |                    |
| Tumor necrosis factor receptor superfamily, member 1A                                | <i>TNFRSF1A</i>  | Forward | TGCCACCCAGATTGAGAA        | 169                |
|                                                                                      |                  | Reverse | ATTTCCCAACAATGGAGTAG      |                    |
| Tumor necrosis factor receptor superfamily member 10B                                | <i>TNFRSF10B</i> | Forward | AAGACCCTTGTGCTCGTTGT      | 144                |
|                                                                                      |                  | Reverse | AGGTGGAC ACAATCCCTCTG     |                    |
| Tumor necrosis factor receptor superfamily member 25                                 | <i>TNFRSF25</i>  | Forward | ACTGCCAACCATGCCTAGACTG    | 155                |
|                                                                                      |                  | Reverse | GAGC CTCCATCCCAGCTTC      |                    |
| Tumor protein p53 (Li-Fraumeni syndrome)                                             | <i>TP53</i>      | Forward | TGCAGCTGTGGGTTGATTCC      | 396                |
|                                                                                      |                  | Reverse | AAACACGCACCTCAAAGCTGTTT   |                    |
| Vascular endothelial growth factor-A                                                 | <i>VEGF-A</i>    | Forward | TACCTCCACCATGCCAAG        | 148                |
|                                                                                      |                  | Reverse | GGTACTCCTGGAAGATGTC       |                    |
| Vimentin                                                                             | <i>VIM</i>       | Forward | CCTTGAACGCAAAGTGGAAATC    | 106                |
|                                                                                      |                  | Reverse | GACATGCTGTTCTGAATCTGAG    |                    |

**Table W3.** qPCR Analysis of Modulation of Gene Expression by Forced Expression of TFF3 in MCF-7 Cells.

| Gene Function                            | Gene            | Ratio (TFF3/Vec)* | P          |
|------------------------------------------|-----------------|-------------------|------------|
| Cell cycle control and DNA damage repair | <i>BRCA1</i>    | 0.93              | 7.30e - 01 |
|                                          | <i>CDK1</i>     | 2.41              | 3.90e - 04 |
|                                          | <i>CDC25A</i>   | 0.79              | 2.90e - 01 |
|                                          | <i>CDC25C</i>   | 1.13              | 4.00e - 01 |
|                                          | <i>CDK2</i>     | 0.64              | 2.20e - 02 |
|                                          | <i>CDK4</i>     | 0.87              | 5.00e - 03 |
|                                          | <i>CDKN1A</i>   | 0.46              | 1.90e - 04 |
|                                          | <i>CDKN1B</i>   | 1.01              | 7.80e - 01 |
|                                          | <i>CDKN2A</i>   | 1.02              | 8.10e - 01 |
|                                          | <i>CCNA1</i>    | 17.07             | 1.20e - 04 |
|                                          | <i>CCNB1</i>    | 1.01              | 5.30e - 01 |
|                                          | <i>CCND1</i>    | 0.61              | 3.20e - 01 |
|                                          | <i>CCNE1</i>    | 0.74              | 1.50e - 01 |
|                                          | <i>E2F1</i>     | 0.85              | 6.00e - 02 |
|                                          | <i>RB1</i>      | 0.94              | 6.60e - 01 |
|                                          | <i>TP53</i>     | 0.91              | 1.13e - 01 |
| Adhesion and invasion                    | <i>CTNNA1</i>   | 0.96              | 8.60e - 01 |
|                                          | <i>CTNNB1</i>   | 0.99              | 9.60e - 01 |
|                                          | <i>CDH1</i>     | 0.74              | 3.00e - 02 |
|                                          | <i>CTNNG</i>    | 0.39              | 5.00e - 02 |
|                                          | <i>FN1</i>      | 2.43              | 1.00e - 02 |
|                                          | <i>C-MET</i>    | 1.36              | 1.40e - 01 |
|                                          | <i>MMP1</i>     | 1.28              | 4.80e - 01 |
|                                          | <i>MMP2</i>     | 0.98              | 6.20e - 01 |
|                                          | <i>MMP9</i>     | 1.08              | 8.40e - 01 |
|                                          | <i>MTA1</i>     | 0.93              | 3.00e - 01 |
|                                          | <i>MTA2</i>     | 0.98              | 8.60e - 01 |
|                                          | <i>NME1</i>     | 0.39              | 1.10e - 06 |
|                                          | <i>OCLU</i>     | 0.80              | 5.00e - 01 |
|                                          | <i>PLAU</i>     | 1.42              | 8.80e - 01 |
|                                          | <i>PLAUR</i>    | 0.59              | 4.00e - 02 |
|                                          | <i>SERPINB5</i> | 1.25              | 3.30e - 01 |
|                                          | <i>SERPINE1</i> | 0.78              | 5.60e - 01 |
|                                          | <i>VEGF</i>     | 1.35              | 1.80e - 01 |
|                                          | <i>VIMENTIN</i> | 2.51              | 1.80e - 04 |
|                                          | Apoptosis       | <i>SLUG</i>       | 0.72       |
| <i>SNAIL</i>                             |                 | 1.25              | 1.10e - 01 |
| <i>SNCG</i>                              |                 | 0.27              | 1.10e - 03 |
| <i>ATM</i>                               |                 | 1.08              | 5.69e - 01 |
| <i>ARAF</i>                              |                 | 1.21              | 7.89e - 02 |
| <i>BAD</i>                               |                 | 0.84              | 4.35e - 01 |
| <i>BAK1</i>                              |                 | 1.01              | 7.70e - 01 |
| <i>BAX</i>                               |                 | 0.05              | 4.40e - 04 |
| <i>BCL2</i>                              |                 | 4.52              | 1.10e - 03 |
| <i>BCL2L1</i>                            |                 | 0.80              | 1.22e - 01 |
| <i>CASP7</i>                             |                 | 0.41              | 3.00e - 04 |
| <i>MCL1</i>                              |                 | 1.10              | 9.00e - 01 |
| <i>S100A4</i>                            |                 | 1.03              | 7.50e - 01 |
| <i>BIRC5</i>                             |                 | 1.26              | 1.40e - 01 |
| <i>RAF</i>                               |                 | 0.92              | 3.00e - 01 |
| <i>HTATIP2</i>                           |                 | 0.44              | 1.20e - 05 |
| <i>TNFRSF10B</i>                         |                 | 1.14              | 1.80e - 01 |
| <i>TNFRSF1A</i>                          | 0.81            | 4.10e - 01        |            |
| <i>TNFRSF25</i>                          | 1.89            | 4.00e - 03        |            |
| Transcription factors                    | <i>ELF5</i>     | 0.80              | 6.00e - 01 |
|                                          | <i>ETS2</i>     | 1.12              | 6.40e - 01 |
|                                          | <i>FOS</i>      | 0.49              | 1.60e - 02 |
|                                          | <i>NFκB1</i>    | 1.19              | 2.70e - 01 |
|                                          | <i>NFκBIA</i>   | 2.94              | 1.59e - 02 |

\*Average of three experiments represents each gene fold changes ( $P < .05$ ). A positive value indicates increased gene expression and a negative value indicates decreased gene expression in MCF7-TFF3 cells relative to MCF7-Vec cells.

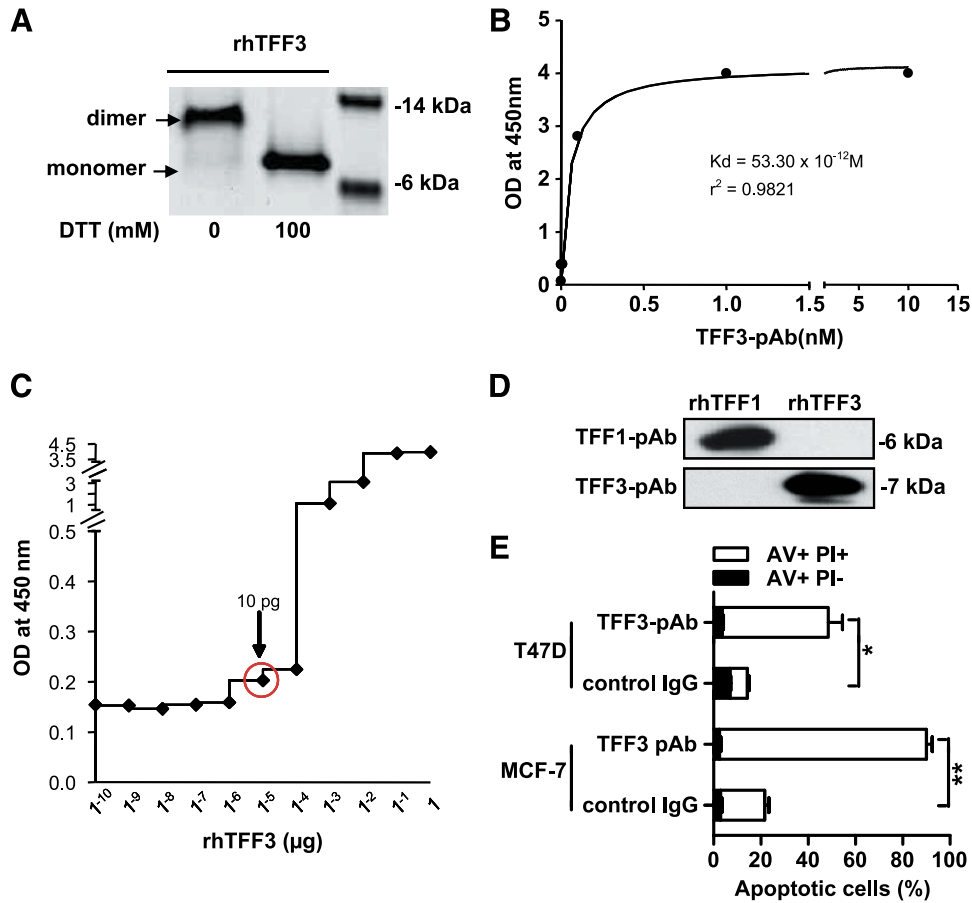

**Figure W3.** Production of rabbit polyclonal antibody against TFF3. (A) SDS-PAGE demonstrating formation of the monomeric and dimeric forms of rhTFF3 protein under nonreducing and reducing conditions, respectively. (B) Affinity binding of TFF3-pAb to rhTFF3 in an ELISA. A 96-well NUNC plate coated with 100 ng of rhTFF3 was incubated with various concentrations of rabbit TFF3-pAb. Bound antibodies were detected by incubation with goat antirabbit IgG conjugated with horseradish peroxidase and colorimetrically measured at 450 nm. (C) The detection limit of TFF3-pAb to rhTFF3 in an ELISA. A 96-well NUNC plate coated with various concentrations of rhTFF3 was incubated with 1  $\mu g/ml$  TFF3-pAb. Bound antibodies were detected by incubation with goat antirabbit IgG conjugated with horseradish peroxidase and colorimetrically measured at 450 nm. (D) SDS-PAGE Western blot analysis of specificity of TFF3-pAb. Protein samples of purified rhTFF1 and rhTFF3 were subjected to SDS-PAGE. The proteins were transferred to a polyvinylidene fluoride membrane and probed by either rabbit TFF1-pAb (top panel) or rabbit TFF3-pAb (bottom panel). (E) MCF-7 and T47D cells were treated with TFF3-pAb at the concentration of 200  $\mu g/ml$  in 0.5% FBS for 24 hours, and apoptosis was determined by annexin V and PI double staining as described in Materials and Methods.



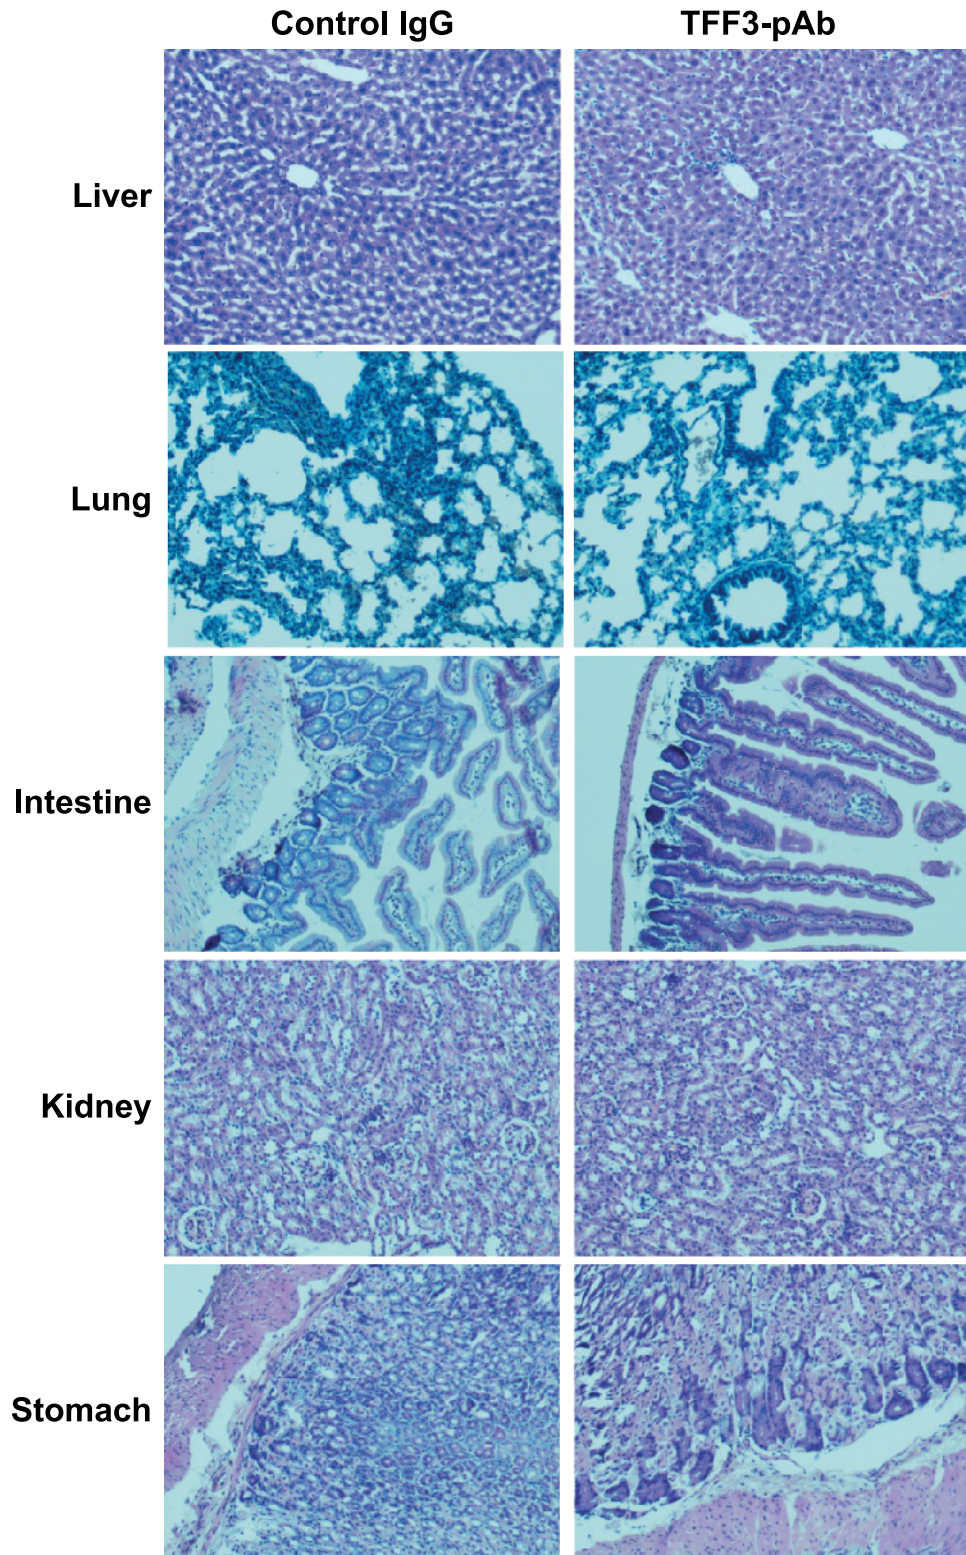

**Figure W4.** Effects of TFF3 polyclonal antibody treatment on morphologic aspects of vital organs of mice. TFF3-pAb was dosed 16 days after MCF-7 cell implantation and thereafter daily for 2 weeks. Histologic analyses with hematoxylin and eosin staining failed to identify any histologic alterations in the vital organs including liver, lung, intestine, kidney, and stomach between TFF3-pAb-treated mice and control IgG-treated mice.

### Meta-analysis of Breast Cancer Microarray Data Sets

Data were collected from publicly available breast cancer microarray data sets in the cancer microarray database Oncomine (www.oncomine.org). *TFF3* gene expression was log-transformed, median-centered per array, and SD normalized to one per array. A meta-analysis approach was used to determine whether higher expression levels of the gene *TFF3* was associated with ER+ or ER- status in breast cancer patients. Using *t* values and sample sizes from each study, we calculated

effect sizes by the standardized mean difference method. The within-study variance for the effect size was calculated as the inverse of the study sample size. The pooled effect size was estimated in an intercept-only model with the study identifiers as random effects; this model was weighted by the between-study variance and the estimated within-study variances that were held constant. The meta-analysis was carried out using the MIXED procedure in SAS version 9.2 (SAS Institute, Inc, Cary, NC).

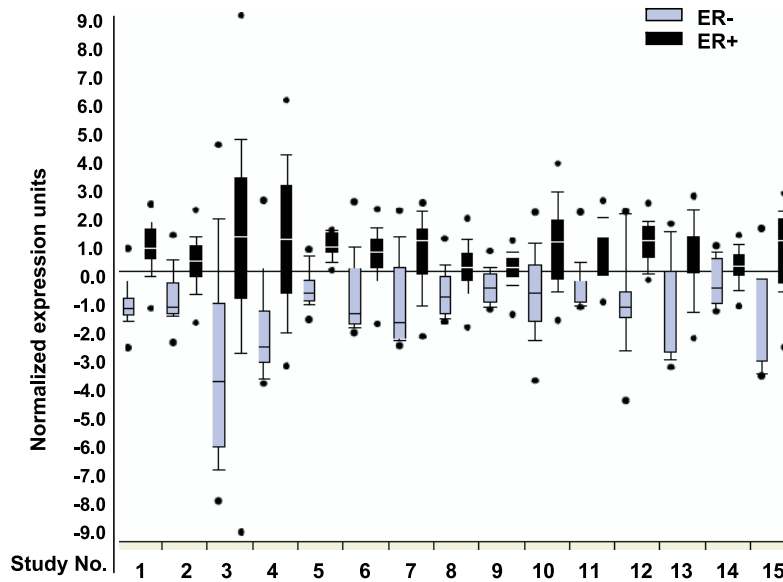

| Analysis        | Patient Number |     | P-value           | Reference |
|-----------------|----------------|-----|-------------------|-----------|
|                 | ER-            | ER+ |                   |           |
| 1               | 42             | 57  | 4.30E-24          | [1]       |
| 2               | 77             | 209 | 5.30E-20          | [2]       |
| 3               | 69             | 226 | 1.40E-16          | [3]       |
| 4               | 33             | 65  | 1.00E-12          | [4]       |
| 5               | 24             | 15  | 8.00E-11          | [5]       |
| 6               | 43             | 75  | 1.70E-10          | [6]       |
| 7               | 51             | 82  | 1.80E-10          | [7]       |
| 8               | 34             | 211 | 7.80E-08          | [8]       |
| 9               | 34             | 213 | 1.60E-07          | [9]       |
| 10              | 30             | 28  | 2.00E-06          | [10]      |
| 11              | 28             | 27  | 5.50E-06          | [11]      |
| 12              | 24             | 25  | 9.80E-06          | [12]      |
| 13              | 18             | 56  | 3.10E-05          | [13]      |
| 14              | 34             | 85  | 2.40E-04          | [14]      |
| 15              | 11             | 24  | 2.60E-04          | [15]      |
| <b>Combined</b> |                |     | <b>&lt;0.0001</b> |           |

**Figure W5.** *TFF3* expression is correlated with ER-positive status in human mammary carcinoma. Meta-analysis of *TFF3* gene expression profiles of human mammary carcinoma obtained from the Oncomine database showing a positive association of *TFF3* mRNA expression with ER-positive status in mammary carcinoma.

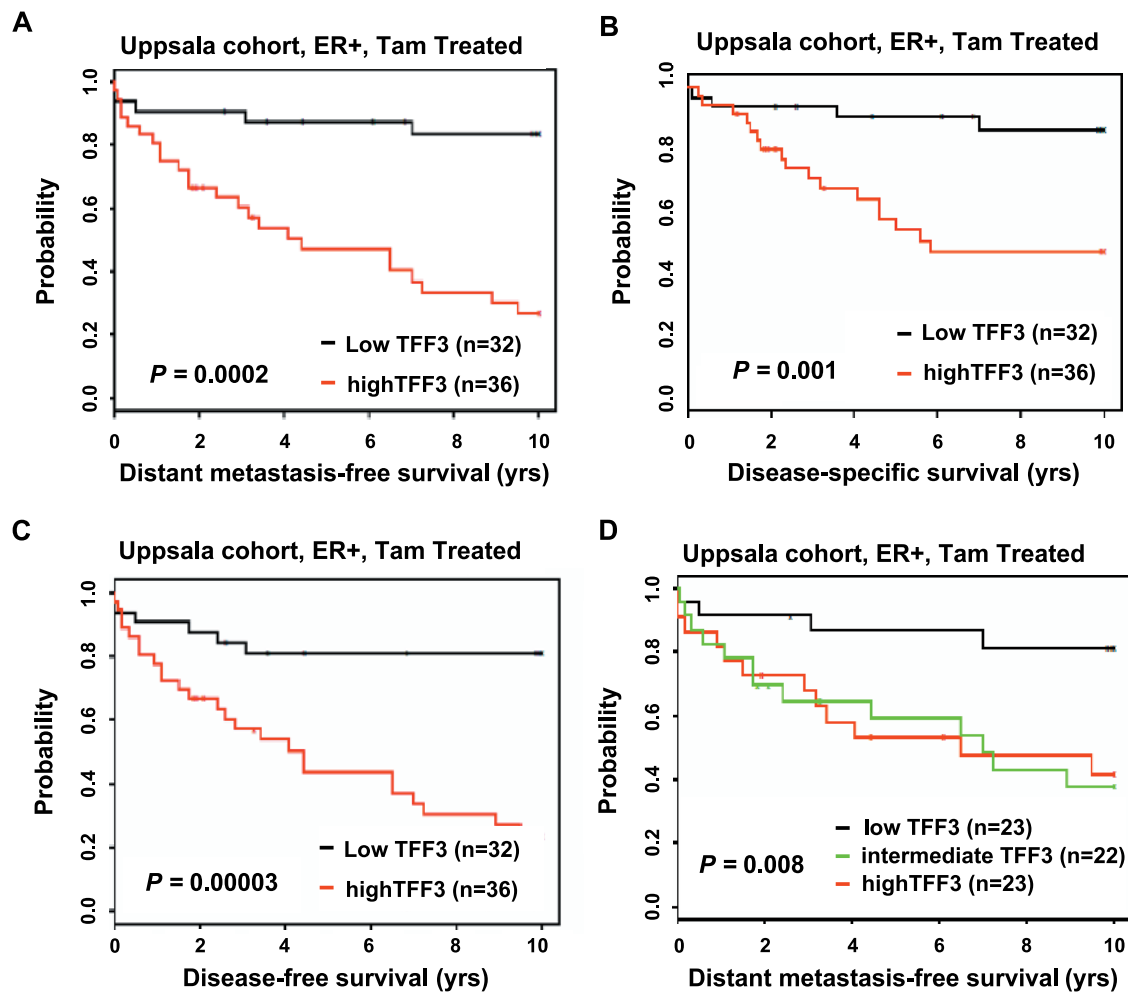

**Figure W6.** *TFF3* mRNA expression is correlated with decreased survival in patients with ER-positive breast cancer treated with tamoxifen. Kaplan-Meier analysis of the correlation of *TFF3* mRNA expression to DMFS (A and D), disease-specific survival (B) and disease-free survival (C) in tamoxifen-treated ER-positive breast cancer patients.

## References

- [1] Minn AJ, Gupta GP, Siegel PM, Bos PD, Shu W, Giri DD, Viale A, Olshen AB, Gerald WL, and Massagué J (2005). Genes that mediate breast cancer metastasis to lung. *Nature* **436**, 518–524.
- [2] Wang Y, Klijn JGM, Zhang Y, Sieuwerts AM, Look MP, Yang F, Talantov D, Timmermans M, Meijer-Van Gelder ME, Yu J, et al. (2005). Gene-expression profiles to predict distant metastasis of lymph-node-negative primary breast cancer. *Lancet* **365**, 671–679.
- [3] Van De Vijver MJ, He YD, Van't Veer LJ, Dai H, Hart AAM, Voskuil DW, Schreiber GJ, Peterse JL, Roberts C, Marton MJ, et al. (2002). A gene-expression signature as a predictor of survival in breast cancer. *N Engl J Med* **347**, 1999–2009.
- [4] Sotiriou C, Neo SY, McShane LM, Korn EL, Long PM, Jazaeri A, Martiat P, Fox SB, Harris AL, and Liu ET (2003). Breast cancer classification and prognosis based on gene expression profiles from a population-based study. *Proc Natl Acad Sci USA* **100**, 10393–10398.
- [5] Richardson AL, Wang ZC, De Nicolò A, Lu X, Brown M, Miron A, Liao X, Iglehart JD, Livingston DM, and Ganesan S (2006). X chromosomal abnormalities in basal-like human breast cancer. *Cancer Cell* **9**, 121–132.
- [6] Chin K, DeVries S, Fridlyand J, Spellman PT, Roydasgupta R, Kuo WL, Lapuk A, Neve RM, Qian Z, Ryder T, et al. (2006). Genomic and transcriptional aberrations linked to breast cancer pathophysiology. *Cancer Cell* **10**, 529–541.
- [7] Hess KR, Anderson K, Symmans WF, Valero V, Ibrahim N, Mejia JA, Booser D, Theriault RL, Buzdar AU, Dempsey PJ, et al. (2006). Pharmacogenomic predictor of sensitivity to preoperative chemotherapy with paclitaxel and fluorouracil, doxorubicin, and cyclophosphamide in breast cancer. *J Clin Oncol* **24**, 4236–4244.
- [8] Ivshina AV, George J, Senko O, Mow B, Putti TC, Smeds J, Lindahl T, Pawitan Y, Hall P, Nordgren H, et al. (2006). Genetic reclassification of histologic grade delineates new clinical subtypes of breast cancer. *Cancer Res* **66**, 10292–10301.
- [9] Miller LD, Smeds J, George J, Vega VB, Vergara L, Ploner A, Pawitan Y, Hall P, Klaar S, Liu ET, et al. (2005). An expression signature for p53 status in human breast cancer predicts mutation status, transcriptional effects, and patient survival. *Proc Natl Acad Sci USA* **102**, 13550–13555.



- [10] Gruvberger S, Ringner M, Chen Y, Panavally S, Saal LH, Borg A, Ferno M, Peterson C, and Meltzer PS (2001). Estrogen receptor status in breast cancer is associated with remarkably distinct gene expression patterns. *Cancer Res* **61**, 5979–5984.
- [11] Ginestier C, Cervera N, Finetti P, Esteyries S, Esterni B, Adailde J, Xerri L, Viens P, Jacquemier J, Charafe-Jauffret E, et al. (2006). Prognosis and gene expression profiling of 20q13-amplified breast cancers. *Clin Cancer Res* **12**, 4533–4544.
- [12] West M, Blanchette C, Dressman H, Huang E, Ishida S, Spang R, Zuzan H, Olson JA Jr, Marks JR, and Nevins JR (2001). Predicting the clinical status of human breast cancer by using gene expression profiles. *Proc Natl Acad Sci USA* **98**, 11462–11467.
- [13] Sorlie T, Perou CM, Tibshirani R, Aas T, Geisler S, Johnsen H, Hastie T, Eisen MB, Van De Rijn M, Jeffrey SS, et al. (2001). Gene expression patterns of breast carcinomas distinguish tumor subclasses with clinical implications. *Proc Natl Acad Sci USA* **98**, 10869–10874.
- [14] Sotiriou C, Wirapati B, Loi S, Harris A, Fox S, Smeds J, Nordgren H, Farmer P, Praz V, Haibe-Kains B, et al. (2006). Gene expression profiling in breast cancer: understanding the molecular basis of histologic grade to improve prognosis. *J Natl Cancer Inst* **98**, 262–272.
- [15] Zhao H, Langerød A, Ji Y, Nowels KW, Nesland JM, Tibshirani R, Bukholm IK, Kåresen R, Botstein D, Børresen-Dale AL, et al. (2004). Different gene expression patterns in invasive lobular and ductal carcinomas of the breast. *Mol Biol Cell* **15**, 2523–2536.
